# Dominant-Negative CK2 $\alpha$ Induces Potent Effects on Circadian Rhythmicity

Elaine M. Smith<sup>1</sup>, Jui-Ming Lin<sup>1\*</sup>, Rose-Anne Meissner<sup>1,2</sup>, Ravi Allada<sup>1\*</sup>

**1** Department of Neurobiology and Physiology, Northwestern University, Evanston, Illinois, United States of America, **2** Northwestern University Interdepartmental Neuroscience Program, Northwestern University, Evanston, Illinois, United States of America

**Circadian clocks organize the precise timing of cellular and behavioral events. In *Drosophila*, circadian clocks consist of negative feedback loops in which the clock component PERIOD (PER) represses its own transcription. PER phosphorylation is a critical step in timing the onset and termination of this feedback. The protein kinase CK2 has been linked to circadian timing, but the importance of this contribution is unclear; it is not certain where and when CK2 acts to regulate circadian rhythms. To determine its temporal and spatial functions, a dominant negative mutant of the catalytic alpha subunit, CK2 $\alpha^{Tik}$ , was targeted to circadian neurons. Behaviorally, CK2 $\alpha^{Tik}$  induces severe period lengthening (~33 h), greater than nearly all known circadian mutant alleles, and abolishes detectable free-running behavioral rhythmicity at high levels of expression. CK2 $\alpha^{Tik}$ , when targeted to a subset of pacemaker neurons, generates period splitting, resulting in flies exhibiting both long and near 24-h periods. These behavioral effects are evident even when CK2 $\alpha^{Tik}$  expression is induced only during adulthood, implicating an acute role for CK2 $\alpha$  function in circadian rhythms. CK2 $\alpha^{Tik}$  expression results in reduced PER phosphorylation, delayed nuclear entry, and dampened cycling with elevated trough levels of PER. Heightened trough levels of *per* transcript accompany increased protein levels, suggesting that CK2 $\alpha^{Tik}$  disturbs negative feedback of PER on its own transcription. Taken together, these in vivo data implicate a central role of CK2 $\alpha$  function in timing PER negative feedback in adult circadian neurons.**

Citation: Smith EM, Lin J-M, Meissner R-A, Allada R (2008) Dominant-negative CK2 $\alpha$  induces potent effects on circadian rhythmicity. PLoS Genet 4(1): e12. doi:10.1371/journal.pgen.0040012

## Introduction

Circadian rhythms that orchestrate daily fluctuations in biochemistry, physiology and behavior are observed across distinct phylogenetic kingdoms. Underscoring the evolutionary importance of these clocks, the molecular processes that drive circadian rhythms are also highly conserved. At the core of the circadian pathway is a transcriptional feedback loop. In *Drosophila melanogaster*, CLOCK (CLK) and CYCLE (CYC) activate expression of target genes such as *period* (*per*) and *timeless* (*tim*) [1–3]. PER and TIM ultimately translocate to the nucleus and inhibit CLK/CYC transcription [3–6]. Notably, the overall architecture of this feedback loop, as well as some of the molecular players, are observed in organisms as diverse as fungi, plants, and mammals [3].

In addition to transcriptional influence in circadian rhythms, posttranslational modification, particularly for PER, has been shown to play a critical role in normal and disordered circadian timing [7–10]. The most well studied kinase CK1/DOUBLETIME (DBT) is hypothesized to regulate PER nuclear entry, repression, and degradation [7,11,12]. A second enzyme, glycogen synthase kinase (GSK3 $\beta$ )/SHAGGY (SGG), regulates phosphorylation of TIM protein, levels, and nuclear entry [13]. These rhythmic phosphorylation cycles also necessarily include the activity of a phosphatase, and protein phosphatase 2A (PP2A) has been implicated in the rhythmic dephosphorylation of PER [14], while protein phosphatase 1 (PP1) has been implicated in the dephosphorylation of both TIM and PER [15].

Our laboratory has been investigating the function of the protein kinase CK2 in circadian clock function [16,17]. The CK2 holoenzyme is a heterotetramer consisting of two alpha catalytic and two beta regulatory subunits [18,19]. Mutant

CK2 $\alpha$  and CK2 $\beta$  alleles result in period lengthening phenotypes (<3 h long), consistent with their proposed clock role [16,20]. The manner in which CK2 is important for setting circadian period remains unclear. CK2 also functions in various developmental processes [18], consistent with the pre-adult lethality observed in CK2 $\alpha$  and CK2 $\beta$  mutants [16,21]. This developmental function raises the question that CK2 phenotypes may derive from its activity during maturation rather than in adults. While both CK2 subunits are expressed in pacemaker neurons [16,20], it is uncertain if CK2 functions in these neurons to regulate circadian rhythms. RNAi studies in S2 cells suggest that the role of CK2 phosphorylation is to promote transcriptional repression by PER [22]; however, it is not clear if this is true in vivo.

To better address these questions, we expressed a dominant negative CK2 $\alpha$  *Timekeeper* (*Tik*) mutant [16] in a spatially and temporally controlled manner and queried the effects on behavior, PER protein levels, phosphorylation, repression, and nuclear entry in core pacemaker neurons of adult *D. melanogaster*. Taken together, these findings reveal remarkably potent effects of manipulating CK2 activity in adult circadian

**Editor:** Michael W. Young, The Rockefeller University, United States of America

**Received** September 10, 2007; **Accepted** December 4, 2007; **Published** January 18, 2008

**Copyright:** © 2008 Smith et al. This is an open-access article distributed under the terms of the Creative Commons Attribution License, which permits unrestricted use, distribution, and reproduction in any medium, provided the original author and source are credited.

\* To whom correspondence should be addressed. E-mail: r-allada@northwestern.edu

‡ Current address: IDEXX Laboratories Inc., Westbrook, Maine, United States of America

## Author Summary

The molecular mechanism that governs organization of physiology and behavior into 24-h rhythms is a conserved transcriptional feedback process that is strikingly similar across distinct phyla. Notably, cyclic phosphorylation of negative feedback regulators is critical to time molecular rhythms. Indeed, mutation of a putative phosphoacceptor site in the human *PERIOD2* gene, a key negative regulator, is associated with Advanced Sleep Phase Syndrome. This study reveals a critical role for the protein kinase CK2 for setting the period of behavioral and molecular oscillations in *Drosophila*. Circadian phenotypes due to CK2 disruption are due to a direct requirement in adult circadian pacemakers. These findings further demonstrate that CK2 modification of the negative feedback regulator PERIOD alters its cyclical phosphorylation, protein abundance, nuclear translocation, and transcriptional repression activity. These studies place CK2 as a central kinase in circadian timing.

neurons and uncover a role consistent with the regulation of PER nuclear localization and feedback repression.

## Results

### Induction of the Dominant CK2 $\alpha^{Tik}$ Mutation in Circadian Neurons Dramatically Lengthens Circadian Period

Prior studies implicate CK2 in the control of circadian function in *Drosophila*, *Arabidopsis*, and *Neurospora* [16,20,23,24]. Testing of the strongest homozygous mutants alleles is limited by developmental lethality [16,21]. More modest period phenotypes raised questions as to the functional significance of CK2 action in the circadian clocks. To determine the consequences of suppressing CK2 activity, we used the GAL4/UAS system to drive expression of CK2 $\alpha$  bearing the dominant *Tik* mutation (CK2 $\alpha^{Tik}$ ) [25]. The CK2 $\alpha^{Tik}$  allele contains two missense mutations, one of which introduces a charged residue into the putative hydrophobic binding pocket for the phosphodonor nucleotide [16,19]. In vitro analysis indicates that these mutations eliminate most catalytic activity [26]. The molecular lesion, the loss of biochemical activity and the dominant behavioral phenotype suggest that *Tik* encodes a dominant negative form of CK2 $\alpha$ .

To examine the behavioral consequences of CK2 $\alpha^{Tik}$  expression, we crossed flies bearing UAS-driven CK2 $\alpha^{Tik}$  (*UASTik*) with *timGal4-62* driver flies [27] and assayed circadian behavior in the progeny (*timGal4/+; UASTik<sup>T1</sup>/+*, “*timTik*”). The *Drosophila* circadian network consists of six bilateral groups of cells: large and small ventral lateral neurons (lg- and sm- LNv), dorsal lateral neurons (LNd), and three clusters of dorsal neurons (DN1–3) [28]. The *tim* promoter induces GAL4 expression in all of these key neuronal clusters that coordinate circadian behavior [29]. To our surprise, these *timTik* flies display extraordinarily long periods averaging  $\sim 33$  h relative to control periods of  $\sim 24$  h (Figure 1, compare Figure 1A and Figure 1B; Table 1). Moreover, the influence on period is dose-dependent; by increasing Gal4 dosage in *timTik* flies with a second circadian driver, *ery16Gal4* [30], the period is further lengthened to  $\sim 37$  h (Table 1). Confirming the circadian specificity of this result, expression of *UASTik* only in photoreceptor neurons with the

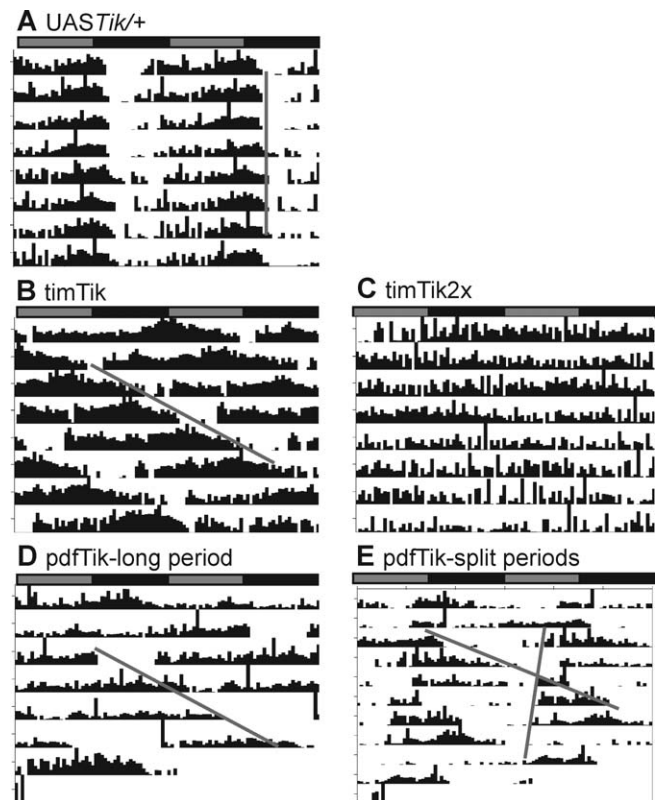

**Figure 1.** Circadian CK2 $\alpha$  Loss of Function Alters Period and Rhythmicity (A–E) Representative double-plotted actograms of indicated genotypes. The x-axis symbolizes two consecutive 24-h time frames; gray bars, subjective day; black bars, subjective night. The y-axis represents consecutive days and vertical black bars represent activity of a single fly. (A) The *UASTik* alone control shows a normal 24-h period. (B) Expression of a single copy of *UASTik* with *timGal4*, a broad circadian driver, lengthens period while (C) increased transgene dosage induces behavioral arrhythmicity. (D) Overexpression of dominant-negative CK2 $\alpha$  in PDF-positive clock neurons causes long periods or (E) period splitting. doi:10.1371/journal.pgen.0040012.g001

GMRGal4 driver [31] does not result in period lengthening (data not shown). Heterozygous *Tik<sup>+</sup>* mutant flies display periods 2–3 h longer than wild-type controls with a reduction of  $\sim 50\%$  in CK2 activity [16]. The magnitude of the period effects strongly argues that CK2 activity is more gravely inhibited in *timTik* flies. The fact that the magnitude of period effects exceeds that of nearly all circadian mutant alleles suggests that CK2 activity is critically important for setting circadian period.

By increasing dosage of the dominant allele with double copies of both the broad circadian *timGal4* driver and the *UASTik* transgene (*timGal4; UASTik<sup>T1</sup>*, “*timTik2x*”), rhythmicity is undetectable in constant darkness (Figure 1C; Table 1). The above results suggest that CK2 $\alpha$  function in central pacemaker neurons is essential for wild type behavioral rhythms. Thus, CK2 $\alpha$  and DBT appear to be the only core circadian kinases demonstrated to be obligatory for free-running behavioral rhythms [11,32]. Mutations in a catalytic subunit of the cAMP-dependent protein kinase (PKA) also result in behavioral arrhythmicity [33]; however, as this lesion leaves core molecular cycling of the clock intact, it is likely to function in an output capacity.

**Table 1.** Expression of Dominant-Negative CK2 $\alpha$  Alters Circadian Period and Rhythmicity

| Genotype                                                                | Period <sup>a</sup> | Strength <sup>b</sup> | %R <sup>c</sup> | n <sup>d</sup> |
|-------------------------------------------------------------------------|---------------------|-----------------------|-----------------|----------------|
| UAS <i>Tik</i> <sup>T1</sup> /+                                         | 23.9 (0.0)          | 150.4 (12.1)          | 97              | 38             |
| <i>timGal4</i> /+                                                       | 24.3 (0.2)          | 118.7 (7.9)           | 100             | 42             |
| <i>timGal4</i> /+; UAS <i>Tik</i> <sup>T1</sup> /+                      | 33.0 (0.1)          | 93.8 (7.3)            | 92              | 53             |
| <i>timGal4</i> /+; <i>cry16Gal4</i> /UAS <i>Tik</i> <sup>T1</sup>       | 36.8 (0.4)          | 35.7 (14.7)           | 50              | 16             |
| <i>timGal4</i> ; UAS <i>Tik</i> <sup>T1</sup>                           | n/a                 | 2.0 (1.0)             | 0               | 24             |
| <i>pdfGal4</i> /+                                                       | 24.3 (0.1)          | 119.4 (13.3)          | 100             | 25             |
| <i>pdfGal4</i> /+; UAS <i>Tik</i> <sup>T1</sup> /+                      | 32.2 (0.6)          | 21.1 (2.7)            | 48              | 105            |
| <i>pdfGal4</i> /+; <i>cry16Gal4</i> /UAS <i>Tik</i> <sup>T1</sup>       | 36.7 (0.2)          | 63.6 (7.9)            | 85              | 33             |
| <i>pdfGal4</i> /+; UAS <i>Tik</i> <sup>T2</sup> /+                      | 24.0 (0.1)          | 95.9 (13.4)           | 100             | 8              |
| <i>pdfGal4</i> /+; UAS <i>Tik</i> <sup>T3</sup> /+                      | 23.9 (0.1)          | 112.5 (6.9)           | 100             | 8              |
| UASKIR/+                                                                | 23.5 (0.1)          | 121.1 (19.1)          | 100             | 10             |
| <i>pdfGal4</i> /+; UASKIR/+                                             | 22.0 (0.6)          | 10.7 (3.6)            | 32              | 22             |
| <i>pdfGal4</i> /+; UAS <i>Tik</i> <sup>T1</sup> /UASKIR                 | 22.6 (0.1)          | 15.8 (4.2)            | 42              | 31             |
| <i>pdfGal4</i> /UAS <i>Tik</i> <sup>S1</sup> ; <i>pdf</i> <sup>01</sup> | 24.1 (0.7)          | 29.9 (4.4)            | 71              | 56             |

<sup>a</sup>Mean period (+/- standard error of the mean).

<sup>b</sup>Mean rhythm strength ("p-s" value, see Methods, +/- standard error of the mean).

<sup>c</sup>Percent rhythmic.

<sup>d</sup>Sample size for the indicated genotypes.

doi:10.1371/journal.pgen.0040012.t001

### Expression of CK2 $\alpha$ <sup>Tik</sup> in PDF+ Pacemaker LNV Leads to Robust Period Lengthening and Complex Rhythms

The neuropeptide Pigment-Dispersing Factor (PDF) mediates transmission of timing information from core LNV pacemaker neurons to downstream neural circuits [34]. The CK2 $\alpha$  and  $\beta$  subunits are strongly expressed in the pacemaker LNV [16,20]. To test the hypothesis that CK2 $\alpha$  functions in pacemaker neurons, CK2 $\alpha$ <sup>Tik</sup> was induced in the LNV using a *pdfGal4* driver [34]. Similar to *timTik* flies, CK2 $\alpha$ <sup>Tik</sup> expression in PDF+ neurons (*pdfGal4*/+; UAS*Tik*<sup>T1</sup>/+, "pdfTik") also results in dramatically long periods (~32 h; Figure 1D; Table 1). Again, these effects are dose-dependent, as adding an additional Gal4 driver, *cry16Gal4*, increased the period length to ~37 h (Table 1). We previously identified a spontaneous revertant allele, *TikR*, which deletes a portion of the *Tik* coding region, largely reverts the dominant circadian phenotype but still lacks catalytic activity, consistent with its characterization as a recessive loss-of-function allele [16]. Supporting this hypothesis, *pdfGal4* expression of independent UAS*TikR* lines had no significant effect on circadian rhythms (Table 1). These results confirm the hypothesis that the *Tik* mutation acts as a dominant-negative to inhibit function of endogenous wild type CK2 $\alpha$ .

PDF neurons communicate with and reset the clocks in non-PDF pacemaker neurons to synchronize different clusters in the network [35]. The CK2 $\alpha$ <sup>Tik</sup> period effects were blocked in a *pdf* null [34] background or by coexpressing an inwardly rectifying potassium channel that hyperpolarizes the LNV (UASKir2.1, [36], Table 1), indicating that CK2 $\alpha$ <sup>Tik</sup> period effects are transmitted by LNV activity and PDF output. These manipulations alone (*pdf*<sup>01</sup> null mutants or expression of UASKIR with *pdfGal4*) result in short, weak periods (Figure S1; Table 1) ([34,36]). These data provide functional evidence that CK2 $\alpha$  operates in pacemaker LNV to regulate circadian period, consistent with published expression data.

While pdfTik flies show a long period phenotype, we also noted variability in the period measurement and reduction of the strength of the rhythm in these flies (Table 1). It was

hypothesized that "wild-type" non-PDF clock neurons were unable to entrain to the long period program in PDF+ cells, and were expressing a secondary rhythm. To see if flies were exhibiting more than one period, we performed periodogram analysis using the Lomb-Scargle method [37,38]. This approach eliminates misidentification of periods that are simply multiples of a true period. This analysis reveals that approximately 45% of pdfTik animals display two significant periods (Figures 1E and 2A). The dominant period is 35.3 (+/- 0.3) h while a secondary peak indicates an average period of 23.2 (+/- 0.1) h (Figures 2B and S2). When UAS*Tik* is expressed as a heterozygote with the broader expressing *timGal4* driver, reduced rhythm strength and splitting is not detectable (Figure 2A; Table 1), suggesting that hyper-elongating period only in PDF-positive LNV causes uncoupling of clock cell groups. We propose that non-PDF neurons are unable to maintain synchrony with PDF clocks with extreme periods. To our knowledge, this is the first example of complex rhythmicity due to altering period length in a subset of pacemaker neurons.

### CK2 $\alpha$ Functions in Adult Pacemaker Neurons to Control Circadian Period

Given that CK2 acts in multiple pathways throughout the life cycle of the fly, we queried if the CK2 $\alpha$ <sup>Tik</sup> phenotype is due to developmental/compensatory effects or whether loss of CK2 $\alpha$  function during adulthood would still result in lengthening of period. In order to address this concern, we utilized a temperature sensitive Gal80 inhibitor of Gal4 expressed in all cells under the tubulin promoter (*tubGal80<sup>ts</sup>*, [39]). This conditional, temporal and regional gene expression targeting (TARGET) system has been previously used to examine the genetic basis of complex behaviors such as memory in *Drosophila* [39]. *tubGal80<sup>ts</sup>* represses GAL4 at the permissive temperature of 18 °C, but is inactivated and fails to repress GAL4 at the restrictive 29 °C temperature. We generated *pdfGal4/tubGal80<sup>ts</sup>; UAS*Tik*<sup>T1</sup>/+* flies and raised them at the permissive temperature (18 °C) to prevent expression of UAS*Tik* so that CK2 $\alpha$  function would be largely intact

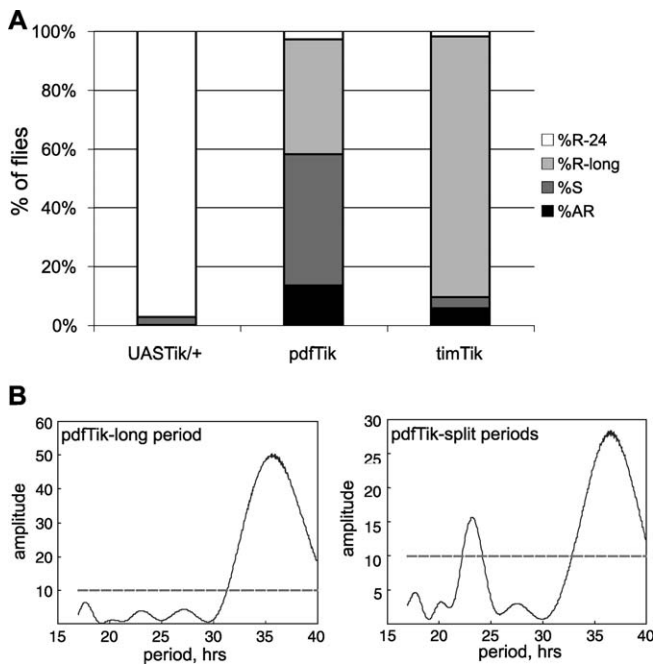

**Figure 2.** Overexpression of Dominant-Negative CK2 $\alpha$  in LNV, but Not All Circadian Neurons, Induces Behavioral Splitting

(A) Percentages of flies in each genotype that show a single ~24-h period (%R-24, white), a single long ~36-h period (%R-long, light gray), two split peaks of ~23 h and ~35 h, (%S, dark gray), and arrhythmicity (%AR, black). *UASTik/+*: control, *pdfTik*: *pdfGal4/+; UASTik<sup>1/+</sup>*, *timTik*: *timGal4/+; UASTik<sup>1/+</sup>*. Overexpression of *UASTik* in LNV only causes behavioral splitting in 45% of flies; such splitting is not observed when all circadian neurons are subjected to *UASTik* expression.

(B) Representative Lomb-Scargle periodograms depicting *pdfGal4/+; UASTik<sup>1/+</sup>* flies with a single long period (left) or split periods (right). doi:10.1371/journal.pgen.0040012.g002

during development. Flies were then tested at either permissive (18 °C) or restrictive (29 °C) temperatures and period was calculated during constant conditions. A cardinal feature of circadian clocks is their temperature compensation, i.e., period is roughly invariant over a broad temperature range [40,41]. Consistent with this idea, the control strain here (*tubGal80<sup>ts/+</sup>; UASTik<sup>1/+</sup>*) shows little period change between 18 °C and 29 °C (Figure 3A and 3B, top panels). Constitutively inhibiting CK2 $\alpha$  in *pdfTik* flies again demonstrates the severe period lengthening effect at both temperatures (Figure 3A and 3B, middle panels); splitting of rhythms in these flies is observed at levels similar to those described above, but only at 29 °C (unpublished data). Interestingly, when dominant-negative *UASTik* is selectively activated at 29 °C during testing of adult flies, the extreme long period phenotype (>30 h) is still manifested (Figure 3A and 3B, bottom panels). Slight period lengthening is detectable at 18 °C; however, this effect is much smaller than observed at 29 °C, and is likely due to incomplete Gal80 inhibition of Gal4. Additionally, two split periods are again observed at 29 °C in conditionally inhibited circadian CK2 $\alpha$  flies, but not at 18 °C (data not shown). These results indicate that CK2 $\alpha$  plays a direct role in adult circadian rhythms, and its loss of function in *Tik* and *UASTik* animals is not likely due to some developmental artifact. Consistent with this idea, inspection of LNV structure and PDF labeling in *UASTik*-expressing brains reveals no gross abnormalities of circadian

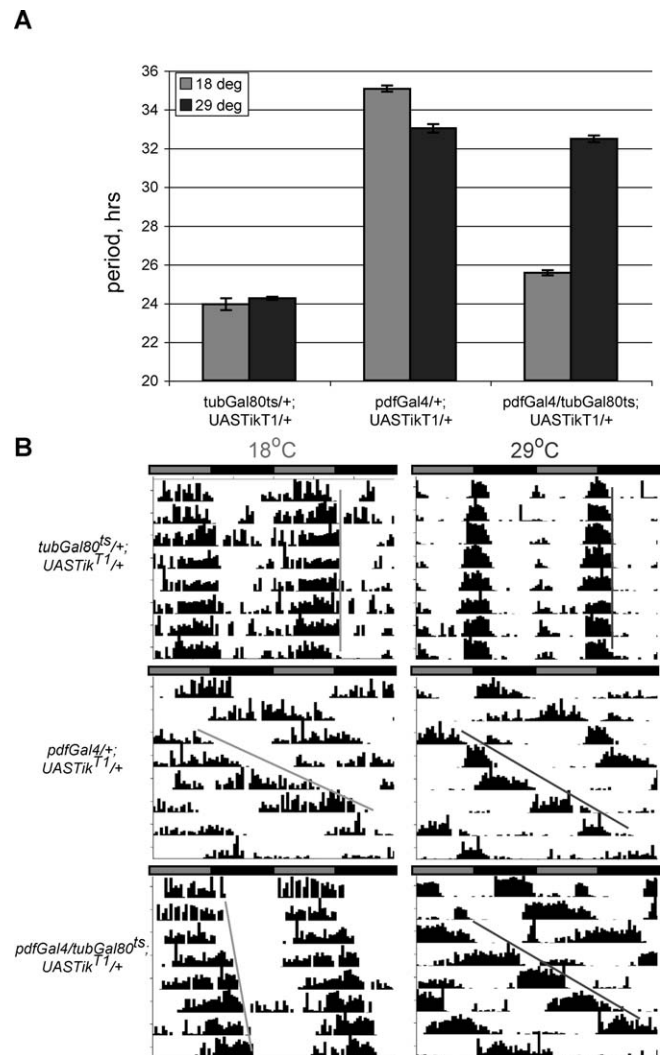

**Figure 3.** Conditional Induction of CK2 $\alpha^{Tik}$  Induces Period Lengthening during Adulthood

Flies were raised at 18 °C to allow Gal80 inhibition of Gal4-mediated transcription and then tested at either the Gal80-permissive (18 °C) or -restrictive (29 °C) temperatures.

(A) Average period values. Period lengthening is observed when *UASTik* is induced in adult LNV acutely during the testing period.

(B) Sample actograms for the indicated genotypes at Gal80-permissive or -restrictive temperatures.

doi:10.1371/journal.pgen.0040012.g003

pacemaker anatomy (unpublished data). To our knowledge, this is one of the few temporal investigations of clock gene function demonstrating an acute role of a circadian gene during adulthood [42,43].

### Inhibition of CK2 $\alpha$ Activity in Pacemaker Neurons Delays PER Rhythms

To determine the effects of CK2 $\alpha$  loss of function on core molecular clock rhythms, we tested whether expression of *UASTik* in PDF-positive LNV altered cycling of the core clock protein PER. Levels and cellular distribution of PER protein in smLNV were examined quantitatively on the first day of DD in *pdfTik* or control Gal4 flies. Although we do observe splitting in these flies, behavior remains largely synchronous on the first day of DD (Figure 4A). Control flies show the

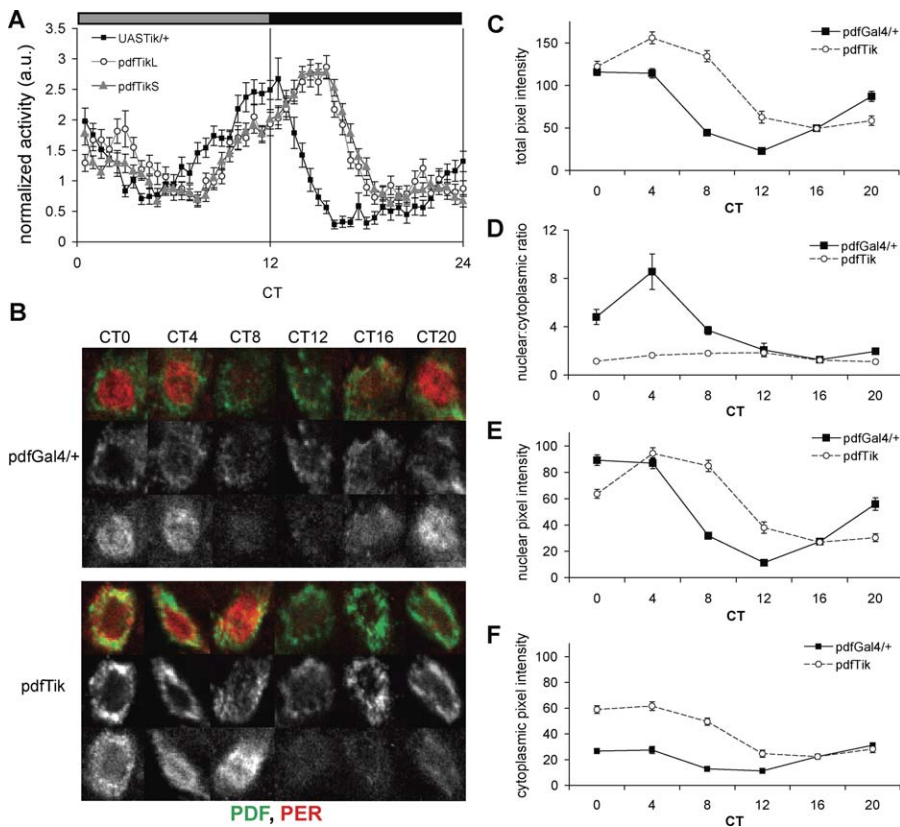

**Figure 4.** Expression of CK2 $\alpha^{Tik}$  in PDF-positive Pacemaker Neurons Increases PER Levels and Delays Nuclear Accumulation

(A) Average behavior activity profile for the first day of constant darkness reveals a delayed evening peak for both long (*pdfTikL*) and split (*pdfTikS*) flies expressing *UAS<sup>Tik</sup>* in PDF+ cells relative to the UAS control alone.

(B) Representative images of smLNv cells labeled for PDF (green) and PER (red) in control (*pdfGal4/+*) and *pdfTik* (*pdfGal4/+; UAS<sup>Tik</sup>/+*).

(C) Quantification of PER levels indicates a delay in the decline of PER protein during middle of the subjective day.

(D) Ratio of nuclear:cytoplasmic PER signal in smLNv from control and *UAS<sup>Tik</sup>*-expressing brains shows a diminished relative nuclear accumulation of PER in *pdfTik* cells.

(E) Average pixel intensity of nuclear PER levels in control and *pdfTik* smLNv nuclei shows delayed nuclear accumulation with CK2 $\alpha$  loss of function.

(F) Cytoplasmic pixel intensity demonstrates elevated levels of PER in *pdfTik* smLNv during early subjective day, suggesting that reduced CK2 $\alpha$  activity causes excess PER to be sequestered in the cytoplasm.  $n = 50$ –76 cells from two independent experiments.

doi:10.1371/journal.pgen.0040012.g004

typical evening peak of activity at  $\sim$ CT12 while the long-period *pdfTik* flies have a delayed evening activity peak, regardless of whether they exhibit split periods or not (Figure 4A, *pdfTikL* v. *pdfTikS*). Measurements of pixel intensity indirectly report the amount of PER protein in smLNv [44]; as seen in Figure 4B and 4C, PER levels are elevated in smLNv of *pdfTik* during the subjective day relative to controls. Wild type PER levels wane from CT4–8 and begin accumulating again in the subjective evening (CT16–20); in contrast, a prolonged decline in PER throughout the day (CT4–12) is evident in *pdfTik* flies, and levels only disappear during subjective evening (CT12–20), consistent with a long period phenotype. Peak and trough PER levels are also elevated in *pdfTik* flies relative to controls ( $p < 0.001$  comparing *pdfGal4/+* CT0 to *pdfTik* CT4 for peak and *pdfGal4/+* CT12 to *pdfTik* CT16 for trough, Figure 4C). PER typically transitions from the cytoplasm to a predominantly nuclear distribution during the middle of the night, and such a pattern is observed in *pdfGal4/+* control flies (Figure 4B and 4D). However, the amplitude of the localization rhythm (as quantified by the nuclear:cytoplasmic ratio) is seriously reduced in *pdfTik* flies (Figure 4D,  $p < 0.001$  at CT0, CT4, CT8, and CT20 *pdfGal4/+* v. *pdfTik*). The timing of nuclear localization is also delayed in

*pdfTik* flies; while PER never becomes predominantly nuclear, the time at which the most PER is localized to the nucleus occurs later from CT4–12 in *pdfTik* smLNv, rather than CT0–4 for the GAL4 control (Figure 4D and 4E). This finding is supported by analysis of nuclear PER levels in *pdfGal4/+* and *pdfTik* smLNv. Nuclear PER levels accumulate to a similar degree in *pdfTik* as in the Gal4 control; however, nuclear levels do not rise until later in the subjective day relative to control (Figure 4E). The overall fraction of nuclear PER is lower (Figure 4D), as more of the PER protein in *pdfTik* neurons remains sequestered in the cytoplasm (Figure 4F). Indeed, the reduced nuclear PER levels in the face of elevated cytoplasmic PER levels at CT0 provide the most compelling evidence that CK2 $\alpha$  is important for nuclear PER localization independent of regulating its cytoplasmic abundance. These results are consistent with prior reports that reduction of CK2 activity inhibits nuclear entry [16].

#### CK2 $\alpha^{Tik}$ Expression Reduces PER Phosphorylation and Increases PER Trough Levels

To quantitatively examine the effect of CK2 $\alpha^{Tik}$  on PER cycling and phosphorylation, we used western blots of whole head extracts on the first day of DD. The far majority of PER

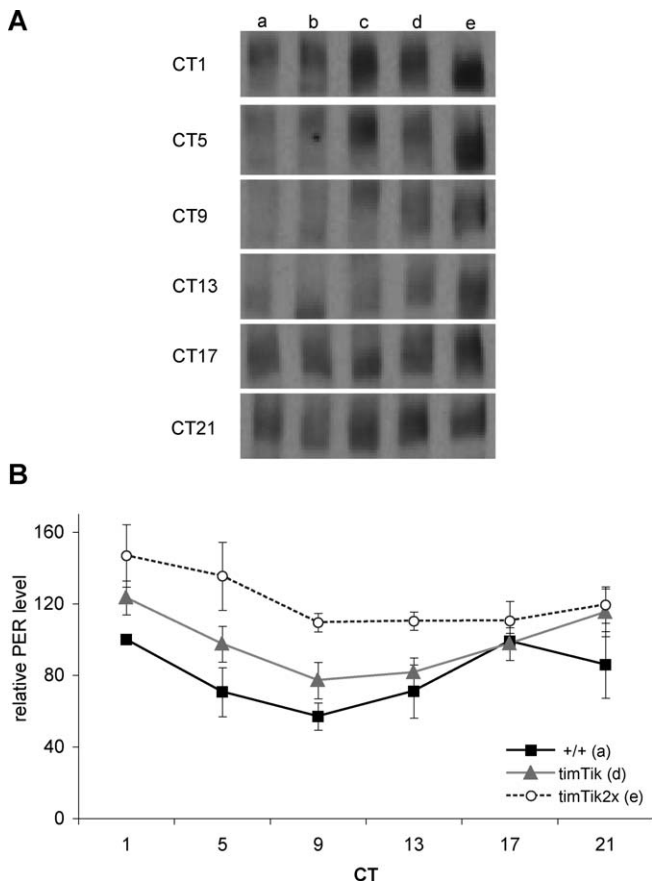

**Figure 5.** CK2 $\alpha^{Tik}$  Circadian Overexpression Alters PER Protein Levels and Mobility

(A) Representative PER western blots demonstrating differences in PER protein amount and mobility with UASTik overexpression during constant conditions. (a) *y w*, (b) *timGal4/+; UASTikR/+*, (c) *Tik/+*, (d) *timGal4/+; UASTik<sup>T1</sup>/+*, and (e) *timGal4; UASTik<sup>T1</sup>*.

(B) Quantification of PER protein levels indicate that decreasing CK2 $\alpha$  function results in elevated levels and delayed decline of PER. +/+; *y w*, *timTik*; *timGal4/+; UASTik<sup>T1</sup>/+*; *timTik2x*; *timGal4; UASTik<sup>T1</sup>*. CT: circadian time. Quantification done from three independent experiments. doi:10.1371/journal.pgen.0040012.g005

in whole heads is expressed in the eye [45]. To examine CK2 $\alpha^{Tik}$  effects we used the *timGAL4* driver that includes strong expression in the eye. In wild-type flies, PER phosphorylation (evident as reduced mobility) peaks in the early subjective morning (CT1, Figure 5Aa). PER levels are subsequently reduced, presumably reflecting phosphorylation-induced degradation. PER begins to appear early in the subjective night (CT13, Figure 5Aa), and levels accumulate during the night as PER becomes progressively more phosphorylated. In *Tik/+* and *timTik* flies, both level and mobility rhythms are delayed, consistent with a lengthened period in these flies (Figure 5Ac, 5Ad, and 5B), while expression of UASTikR was not detectably different than wild type (Figure 5Ab).

We then examined flies with two copies of the *timGAL4* and UASTik transgenes (*timTik2x*). These flies did not exhibit any significant behavioral rhythms (Table 1). Severe reduction of CK2 $\alpha$  activity in homozygous *timTik2x* flies exacerbates PER metabolism during constant conditions, causing constitutive elevations in PER protein and minimizing the amplitude of

PER cycling (Figure 5Ae and 5B), consistent with reduced behavioral rhythmicity. These effects are most evident at wild type trough times for PER ( $p < 0.01$ , significant effect of genotype at CT9). In addition, PER fails to achieve a hyperphosphorylated state in *timTik2x* flies (Figure 5Ae). This consequence is most evident at CT1, time of peak phosphorylation in wild type. These findings support the notion that CK2 $\alpha$  ensures the proper timing of PER cycling and function. While we cannot exclude the possibility that CK2 indirectly regulates the post-translational modification of PER, the strong effects on PER mobility in CK2 loss-of-function flies argue that PER is an *in vivo* CK2 substrate, consistent with previous studies [17].

### Negative Feedback Repression Is Altered by CK2 $\alpha^{Tik}$ Expression

Previous studies have implicated CK2 in promoting PER repression of CLK activation [22]. However, these studies were performed in cultured *Drosophila* S2 cells which do not harbor functioning circadian clocks. To test the hypothesis that CK2 promotes PER repression *in vivo*, we examined circadian transcription in UASTik expressing flies. Levels of two CLK-activated transcripts, *per* and *vri* (*vri*) [46] were analyzed using quantitative real-time reverse-transcriptase polymerase chain reaction (qRT-PCR). We hypothesized that if negative feedback is unaffected in UASTik expressing flies, then elevated PER levels would strongly repress CLK, reducing *per* and *vri* transcript levels. If negative feedback is disrupted, then elevated PER levels would fail to appropriately repress *per* and *vri* transcription. Expression of dominant-negative UASTik in circadian neurons in *timTik* flies postpones the decline in *per* transcript until early subjective night (Figure 6A), consistent with the effect of CK2 $\alpha$  loss of function in the heterozygous *Tik/+* mutant. Whereas wild type *per* transcription peaks around CT9–13, *per* levels do not achieve maximum until CT13–17 in *timTik* flies, and a similar pattern emerges from analysis of the *vri* transcript (Figure 6B).

The most informative result becomes apparent in *timTik2x* flies. Further reductions in CK2 $\alpha$  activity in *timTik2x* result in *per* and *vri* transcript levels with a severely reduced amplitude rhythm (Figure 6A and 6B). Importantly, *per* and *vri* never reach wild-type trough levels (*per*:  $p < 0.001$  for *y w* at CT1 relative to *timTik* and *timTik2x* at CT5 and  $p < 0.01$  for *vri* at the same time points), consistent with the hypothesis that elevated PER protein levels are unable to fully repress CLK target genes in UASTik-expressing flies. Taken together, the magnitude of the observed effects suggests that CK2 not only promotes PER repression activity *in vivo*, but that it has a sizable impact on transcriptional repression.

### Discussion

The role of posttranslational modification in regulating precise circadian timing is well established [9], and indeed may be principally responsible for molecular cycling [8]. CK2 has been implicated in regulating circadian rhythms, PER modification and metabolism [16,17]. The present study sought to determine if CK2 $\alpha$  activity is required in adult core pacemaker neurons for molecular and behavioral rhythmicity. Broad spatial expression of UASTik in pacemaker neurons with the *timGal4* driver causes severe length-

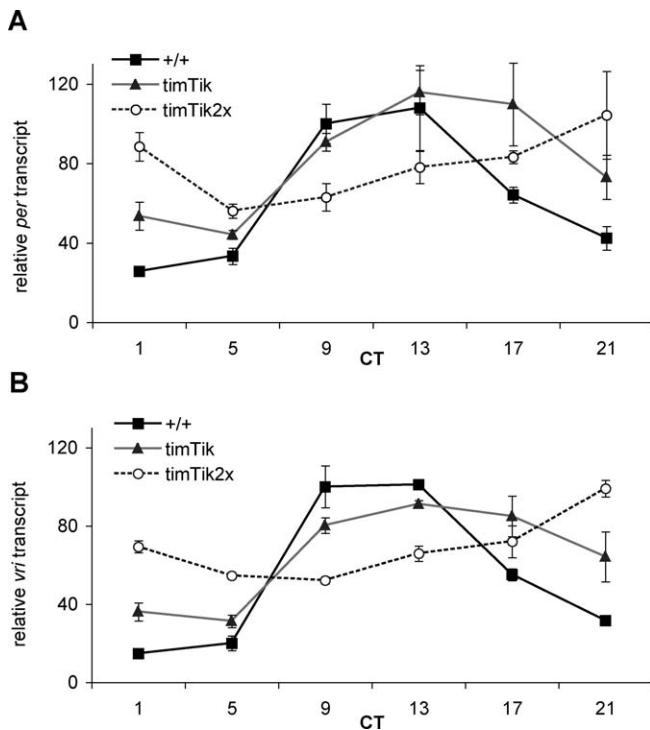

**Figure 6.** Circadian CK2 $\alpha$  Loss of Function Impacts Clock Gene RNA Levels

(A) Overexpression of one copy of *UASTik* leads to elevated levels of *per* transcript during early subjective night, while further diminishing CK2 $\alpha$  function with two copies each of *timGal4* and *UASTik* greatly diminishes the amplitude of *per* RNA cycling.

(B) Analysis of *vri* transcript reveals a similar pattern of delayed and dampened transcript persistence when CK2 $\alpha$  activity is inhibited in circadian cells. +/+; *y w*, *timTik*; *timGal4*/+; *UASTik*<sup>T1</sup>/+; *timTik2x*; *timGal4*; *UASTik*<sup>T1</sup>. CT: circadian time. Values obtained from two to three independent experiments.

doi:10.1371/journal.pgen.0040012.g006

ening of circadian period to  $\sim 33$  h, a degree even greater than that of the heterozygous *Tik* mutant. Radical reductions in CK2 $\alpha$  activity by increasing copy number of the transgenes in *timTik2x* flies ultimately result in behavioral arrhythmicity, demonstrating that CK2 $\alpha$  is an obligatory component of circadian rhythms. Previous work demonstrated that overexpression of wild type CK2 mildly lengthens period [17]; taken together, these data indicate that period is highly sensitive to CK2 activity. Expression of *UASTik* in PDF+ LNV is also sufficient to lengthen period; indeed, the effect requires LNV activity and output of the PDF neuropeptide. That the period length is not exacerbated by additional clock neuron expression in *timTik* versus *pdfTik* flies implies that the phenotype originates largely from the LNV; however, the possibility that CK2 $\alpha$  additionally functions in other circadian cells cannot be excluded. Given that splitting is eliminated when the genetic programs of both LNV and downstream circadian neurons are identical with respect to *UASTik* expression, the data imply that this manipulation affects CK2 function in other clock cells. Indeed, if CK2 is a true component of the core transcriptional pacemaker, it would be expected to regulate feedback in all cells that have a functional molecular clock. As CK2 functions to dictate period in LNV cells during constant conditions, it is possible that CK2 activity may also regulate morning behavior, as

these cells drive morning activity, while downstream neurons dictate evening activity [47,48]. However, as CK2 may also function in cells responsible for evening behavior, some balance of CK2 between LNV and non-LNV neurons could favor a strong morning or evening activity phase. The contribution of CK2 activity to morning and evening behavior is currently under investigation.

Further evidence that CK2 $\alpha$  activity is important in LNV derives from the finding that inhibition by CK2 $\alpha$ <sup>*Tik*</sup> causes delayed nuclear entry of PER in these core pacemaker cells. An unanticipated consequence of *pdfTik* expression is splitting of the behavioral rhythm into long ( $\sim 35$  h) and short ( $\sim 23$  h) components. All of the above behavioral effects are due to acute CK2 $\alpha$  activity as adult-specific inhibition is able to induce the rhythm phenotypes. At the molecular level, elevated levels and diminished phosphorylation of PER protein is associated with reduced CK2 $\alpha$  function; this effect on PER protein is further correlated with elevated and delayed transcription of *per* and *vri* clock genes.

The severity of the observed behavioral phenotype places CK2 as a critical regulator of circadian rhythms. Of known circadian kinases, only mutants of *doubletime* (*dbt*) and PKA are also capable of completely eliminating rhythmicity as is observed in *timTik2x* flies [32,33]. As the core molecular clock is unperturbed by PKA mutations, this kinase is proposed to function in circadian locomotor output [32,33], leaving DBT and CK2 as the only critical core circadian kinases. Originally, DBT was found to regulate PER stability and electrophoretic mobility; this initial study concluded that DBT-mediated phosphorylation led to PER degradation [11,49]. Subsequent studies suggested that DBT may retard the ability of PER to enter the nucleus and repress transcription [12,22,50]. Many other gene mutations that result in arrhythmicity affect either input or output of the circadian system. As the core molecular feedback loop is disrupted in *UASTik*-expressing flies, CK2 appears to regulate timing of the core clock and shows phenotypes similar to mutants of other core circadian genes such as *per*, *tim*, and *Clk*. However, the magnitude of the period phenotype in both *pdfTik* and *timTik* flies is greater than nearly all circadian mutants. The only other alleles which produce a similar degree of period lengthening include the *tim*<sup>UL</sup> mutation [51] and a novel dominant-negative kinase dead *dbt* allele whose expression also results in period lengthening or arrhythmicity [52].

We present numerous pieces of evidence to support the hypothesis that CK2 $\alpha$  acutely functions in the PDF+ LNV neurons. The long period phenotype observed when CK2 $\alpha$ <sup>*Tik*</sup> is expressed in PDF-positive LNV is associated with splitting of the behavioral rhythm into two components: a predominant, long,  $\sim 35$  h period and a weak shorter period of approximately 23 h. The splitting is reflected in the low strength of behavioral rhythms observed in *pdfTik* flies. Splitting was originally observed in Syrian hamsters maintained under constant light; this finding was the foundation for a two-oscillator model whose coordinated output is manifested as an overt circadian rhythm [53]. It has similarly been shown that non-conventional entrainment conditions can induce multi-period splitting and desynchronization of circadian neurons in mammals [54,55]. Early reports indicated splitting of the *Drosophila* circadian period in *sine oculis* mutants that have disrupted optic development, suggesting that dual periods may arise from entrainment

through different input pathways [56]. Similarly, both wild type flies under low light and mutants of *cryptochrome*, the major circadian photoreceptor, exhibit split rhythms under constant light [57,58]. These periods include short ( $\sim 22$  h) and long ( $\sim 25$  h) components that alternatively decrease or increase with light intensity, respectively, again implicating variation of the oscillator system input pathway. Ectopic misexpression of the PDF output neuropeptide induced multiple periods during DD (of  $\sim 22$  h and  $\sim 25$  h) [59]. Nitabach et al. [38] further identified complex rhythmicity by activating LNV neurons; at least two periods of  $\sim 22$  or  $\sim 25$ – $26$  h lengths are observed (with an occasional 3<sup>rd</sup>, shorter  $\sim 20$ – $21$  h peak). Elevated PDF levels and desynchronization of circadian neurons are detected in these flies [38]. Both of the above cases suggest that split periods arise from misregulation of neuronal output from the core pacemaker neurons. The result presented here is the first demonstration of splitting as a consequence of altering a core clock component.

It is hypothesized that driving the oscillator period to such an extreme only in the LNV uncouples them from non-UAS*Tik* expressing, PDF-negative “wild type” circadian neurons (i.e., LNd/DNs) that then contribute the shorter, weaker behavioral rhythm ( $\sim 23$  h), such as that seen in *pdf<sup>o1</sup>* mutants [34]. This notion is further supported by the behavior of *timTik* flies that express UAS*Tik* in all circadian neurons; in this case, when the genetic programs of all clock cells are identical, no such splitting is observed and rhythm strength returns to normal levels. These results begin to examine the limits of entrainment of one oscillator by a coupled oscillator in a circadian pacemaker network.

CK2 has a number of roles in cellular biology [18]. It is required at multiple transitions during the cell cycle including mitosis and functions to regulate caspase-mediated apoptosis and cell survival [18]. Developmentally, CK2 regulates proliferation and cell fate decisions [25,60]. Not surprisingly, it is an essential gene, as homozygous *Tik* mutants are not viable as adults [16]. We were able to utilize the TARGET system [39] to conditionally induce dominant-negative CK2 $\alpha$  in adult flies. Interestingly, when CK2 $\alpha$  activity was inhibited in LNV solely during adulthood, the behavioral phenotypes are still manifested. Thus, an acute CK2 $\alpha$  loss of function impacts rhythmicity in the adult circadian system, presenting it as a critical and direct regulator of the circadian clock. While it has been shown that such adult-specific rescue of *per* is able to restore rhythmicity in *Drosophila* [43], it will be important to investigate the life-stage properties of other circadian genes; for example, *Clk* is also known to have developmental roles [61].

Thus, CK2 $\alpha$  is an acute, direct, and essential component of circadian rhythms; we propose that CK2 regulates the core oscillator by phosphorylating PER to promote nuclear entry and repression. There is abundant evidence for PER as a *bona fide* CK2 $\alpha$  substrate. CK2 $\alpha$  can phosphorylate PER in vitro at specific predicted CK2 $\alpha$  sites [16,17]; moreover, mutation of these CK2 $\alpha$  target residues causes period phenotypes similar to the *Tik* mutation when expressed in vivo, demonstrating the functional relevance of this modification on PER activity [17]. Finally, we present here the clear defects in PER mobility observed with a deficiency in CK2 $\alpha$  activity. Expressing UAS*Tik* singly or in double dosage with the *timGal4* driver results in increased, hypophosphorylated PER. Indeed, the

amplitude of PER cycling appears completely diminished when CK2 $\alpha$  is severely inhibited in *timTik2x* flies. Again, the molecular PER phenotype mirrors the behavioral effect of these manipulations; *timTik2x* flies are arrhythmic under constant conditions, supporting the idea that CK2 $\alpha$  activity is critical for the maintenance of a molecular and behavioral clock.

A further consequence of CK2 $\alpha$  loss of function in core pacemaker neurons is a pattern of delayed PER decline, consistent with the long period phenotype observed in these flies. Despite increases in overall and cytoplasmic PER levels, nuclear PER levels are lower relative to wild type during the early subjective day, providing further evidence that nuclear translocation is not strictly driven by protein accumulation [50,62]. The dampened and delayed nuclear entry of PER protein of CK2 $\alpha$ <sup>*Tik*</sup>-expressing smLNV provides support that CK2 $\alpha$  normally functions to promote PER nuclear translocation. A second possibility is that the high levels of PER protein saturate the nuclear entry pathway, preventing the majority of PER from localizing to the nucleus in *pdfTik* flies. Yet, the delay in nuclear accumulation is consistent with the hypothesis that CK2 $\alpha$  activity typically functions to permit timely PER nuclear entry.

Previous evidence indicated that knock-down of CK2 levels in cultured *Drosophila* S2 cells limits the ability of PER to repress a *Clk*-driven luciferase reporter [22]. It is critical to validate such studies in vivo to determine the true function of the kinase in the circadian system. While one may expect that the increased levels of PER associated with CK2 $\alpha$ <sup>*Tik*</sup> expression (particularly at trough time points) would lead to enhanced clock gene repression, we do not see such an effect. Conversely, CK2 $\alpha$  inhibition results in delayed *per* and *vri* transcription, and elevated trough transcript levels, confirming that CK2 $\alpha$  normally operates to promote repression of clock gene transcription. The features of CK2 $\alpha$  function are both in opposition with and complementary to those put forth for the DBT kinase. DBT is thought to retard PER nuclear entry [12] and signal its degradation [11]; in contrast, CK2 $\alpha$  appears to promote nuclear entry of PER (and hence repression), but may also influence its turnover.

We have outlined a model of the way in which CK2 promotes repression of circadian transcription developed from existing and currently presented data. We speculate that effects of CK2 on PER nuclear localization may operate through the proposed interval timer described in S2 cells. Based on the interval timer model, PER and TIM heterodimerize in the cytoplasm in a time-insensitive manner [63]; after some lag or upon some signal, they dissociate and enter the nucleus independently [44,63] where PER mediates transcriptional repression. The role of nuclear TIM is yet unclear. Recent work indicates that repression is not achieved merely by physical association of PER with CLK, but perhaps by PER acting as a scaffold to bridge CLK and DBT [64]. It is hypothesized that phosphorylation of CLK by DBT diminishes its transactivating capabilities [64], similar to the model proposed in *Neurospora* [23]. Nawatheatan et al. conclude that the ability of PER to repress transcription is primarily a function of its nuclear localization, which is, in turn, dependent on phosphorylation [65]; however, they also acknowledge that phosphorylation may secondarily modulate the intrinsic ability of PER to enact repression. While PER is predominantly cytoplasmic in S2 cells (e.g., [65]), altering its



subcellular localization by adding a nuclear localization signal or blocking nuclear export increases transcriptional repression; however, this activity is reduced in mutants that lack a critical DBT binding site shown to be important for PER phosphorylation [64,65]. Thus, the data from S2 cells does not resolve whether activity primarily regulates PER nuclear entry or repression, but provides evidence for both functions. The conflicting S2 cell results, particularly for DBT analysis, support the use of our *in vivo* approach to determine the role of kinase modification on molecular cycling.

We propose that the effects of CK2 loss of function on feedback repression are due, in part, to the inability of PER to properly translocate to the nucleus. Phosphorylation of the PER:TIM heterodimer in the cytoplasm by CK2 may act as the interval-timer signal [63] to dissociate this complex and/or facilitate nuclear entry. Indeed, with reduced CK2 $\alpha$  function, PER nuclear accumulation is delayed, and correlates with delayed repression of circadian transcription. DBT functions to induce degradation of free cytoplasmic PER, as well as hyperphosphorylated nuclear PER. We propose that increased and lingering levels of PER in UASTik-expressing brains is due to an inability of CK2 to signal dissociation of the PER:TIM heterodimer. Persistence of PER in this complex and its failure to independently enter the nucleus protects it from DBT-mediated phosphorylation. The lack of DBT phosphorylation would reduce PER degradation and repressor activity, leading to increased cytoplasmic PER and altered feedback repression. Intrinsic PER repressor function does not appear to be greatly compromised by CK2 loss of function, as liberation of PER after light-induced TIM degradation in *timTik2x* flies results in robust suppression of *per* RNA (R. Meissner, J. Lin, unpublished observations). As nuclear entry is a critical step in feedback repression, CK2 function is important for the maintenance of a functional molecular and behavioral clock. Alternatively, CK2 may promote PER-TIM dimerization and subsequent nuclear entry. CK2 may facilitate PER's interaction with CLK and thus enhance repression. Lastly, CK2 could function to augment DBT phosphorylation of PER either by modulating DBT activity or by providing a phosphorylated substrate for recognition by DBT, thus controlling PER abundance.

Conditional spatio-temporal expression of this dominant-negative CK2 $\alpha$  mutation is a useful tool for *in vivo* exploration of the myriad roles of CK2 in all aspects of biology. The UASTik transgene has already been used to dissect features of CK2 function during *Drosophila* eye development [25]. Here, the use of such a strong CK2 $\alpha$  allele permits dissection of the molecular, genetic, and neuro-anatomical clock. Ultimately, these studies provide a model in which CK2 $\alpha$  activity in the core adult pacemaker is critical for the proper timing of the transcriptional feedback loop. The critical role of CK2 $\alpha$  in pacemaker function highlights the importance of a concerted post-translational modification scheme to regulate cycling of core clock components in order to manifest precise circadian rhythms at the molecular and behavioral level. Indeed, mutation of a phosphorylation site in the human *per2* gene is responsible for Familial Advanced Sleep Phase Syndrome [10]. As CK2 is highly conserved across kingdoms and has been shown to function in the circadian pathway of other species [23,24], it is a priority to investigate its role in mammalian circadian rhythms.

## Materials and Methods

**Fly stocks.** For generation of UASTik lines, we cut the *Bgl*II and *Xho*I fragment containing *Tik* from pET-*Tik* [16], and cloned it into pUAST to create transgenic flies. All transgenic DNA constructs were sequenced (Applied Biosystems, Foster City, CA) and injected in *y w* embryos at CBRC Transgenic *Drosophila* Core (Charlestown, MA). Transformant lines with inserts on the second or third chromosome were balanced with *y w;Bl/Cy0* or *y w;TM2/TM6B*, respectively. Distinct UASTik insertions are denoted with *S1* or *T1* superscripts for second or third chromosome inserts, respectively. The revertant *TikR* allele was similarly cloned, and UASTikR inserts are also designated with the superscripts *T2* or *T3* indicating two discrete third chromosome insertions.

For additional fly lines, the *pdfGal4* and *timGal4-62* drivers [27,34] as well as *pdf<sup>01</sup>* mutants [34] were obtained from Michael Rosbash, Brandeis University. The UAS-Kir2.1 flies are previously described [36] and were acquired from Grae Davis, UCSF. *tubGal80<sup>ts</sup>* flies [39] were ordered from the Bloomington Stock Center, Indiana University. Flies were maintained in standard cornmeal-molasses-agar food at 25 °C unless otherwise noted.

**Behavior.** As described [66], male flies aged 2–7 days old were entrained to 2–5 days of 12 h light:12 h dark (LD) and exposed to 7–10 days of constant darkness (DD). Activity patterns were monitored by the *Drosophila* Activity Monitoring system (TriKinetics) in 30 min bins. Clocklab software (Actimetrics) was used to calculate period estimates using a chi-square periodogram ( $\alpha = 0.01$ ). Rhythm strength was measured as the power of each record minus the significance (“p-s”). Flies were considered rhythmic if they exhibit a p-s value of >10. Visual inspection of actograms was performed to confirm rhythmicity (or lack thereof) in weakly rhythmic flies. Lomb-Scargle periodograms were constructed using Clocklab to score period splitting as previously described [38] except significance was set at  $\alpha = 0.01$ . Period peaks were considered if they crossed the significance line; the percent of flies exhibiting a single peak of ~24 h versus a single long period or two peaks was calculated.

For developmental analysis (*tubGal80<sup>ts</sup>* crosses), flies were mated and progeny raised at 18 °C. Flies were then placed into the behavior apparatus and exposed to 5 days of LD and 7–10 days of DD at either 18 °C or 29 °C such that the LD phase allowed Gal4 induction (at 29 °C) while circadian behavior was calculated during the DD phase.

**Immunostaining.** Adult male flies of the indicated genotypes aged 2–10 days were entrained to at least 3 days of LD and shifted to DD. Brains were dissected on the first day of DD as follows (modified from [44]): following brief anaesthetization, flies were pinned to a Sylgard dish and the proboscis was removed. Cold PBS was placed around the wound until all flies for that time point were processed. PBS was replaced with 4% formaldehyde/PBS to fix for 15 min. The brain was then dissected away from the head capsule under cold PBS, fixed again for 20 min, and stored in PBS at 4 °C overnight. Brains were washed 2 × 5 min in PBSTx (PBS+0.3% Triton-X100), blocked 30 min in PBSTG (PBSTx+10% normal goat sera), and incubated in the following primary antibodies overnight: rabbit anti-PER 1:4,000 and rat anti-PDF 1:1,000 [61,67], gifts from M. Rosbash, Brandeis University. Antibody was removed and brains were washed 4 × 10 min in PBSTx, then incubated with secondary goat anti-rabbit-Alexa488 (Molecular Probes, Invitrogen) and donkey anti-rat- Cy3 (Jackson ImmunoLabs) both at 1:500 dilutions for at least 2 h at room temperature. Final washes of 4 × 10 min in PBSTx were performed, brains were rinsed in PBS, and placed in 80% glycerol overnight at 4 °C before mounting.

Immunofluorescence was imaged with a Nikon C1 confocal microscope and analyzed as reported [44]. Briefly, PDF staining was used to determine cytoplasmic/nuclear compartments, and the average pixel intensity for PER staining was measured with Image J (National Institutes of Health). Background levels in nearby pixels were subtracted from the raw data, and total amounts and the nuclear:cytoplasmic PER signal ratio were calculated for each fly using Excel. A t-test was used to determine the significance between total peak and trough PER values for Gal4 controls versus *pdfTik* at the indicated CT. T-tests were also employed to probe differences in the nuclear:cytoplasmic ratio amongst the genotypes.

**Western blotting.** Quantification of PER western blotting was performed as described previously with NIH Image J [16]. Equal loading and transfer were confirmed with Ponceau S staining of membranes. The dilutions for the primary and secondary antibodies were 1:10,000 and 1:2,000 in TBST buffer (ECL protocol; Amersham Biosciences). Five TBST buffer washes lasting 5 min each were performed following the primary and the secondary antibody incubations. Blocking was achieved with TBST+5% milk (Bio-Rad).

The incubation times for blocking, primary and the secondary antibody incubations were as follows: 1 h at room temperature, overnight at 4 °C, and 1 h at room temperature, respectively. ECL reagents were used for immunoassay signals. A single-factor ANOVA compared the effect of genotype at trough time points.

**Quantitative real-time PCR.** Total RNA was isolated from frozen whole heads using TRIzol reagent (Invitrogen) according to the manufacturer's protocol. DNA was removed from RNA extracts using RQ1 DNase from Promega. Real-time PCR reactions were run using the Applied Biosystems 7900HT fast real-time PCR instrument. Data were collected using SDS software version 2.2.1. Data were analyzed using the  $2^{-\Delta C_t}$  method [68] using *RP49* expression values to normalize for differences in RNA amount among samples. Statistical significance was evaluated for trough transcript levels by comparing the effect of genotype at the indicated CT using a single-factor ANOVA.

For PCR reactions, ~100 ng RNA were used per reaction. Reactions were prepared using the reagents from the Qiagen QuantiTect SYBR Green RT-PCR kit. Total reaction volume was 25 ml and reactions were run in 96-well plates. Primer sets used were ordered from Integrated DNA Technologies. Primer sequences are as follows. *per*: forward primer is 5'-CAGCAGCAGCCTAATCG-3', and the reverse primer is 5'-GAGTGGACACCTTGG-3'. *vri*: forward primer is 5'-TGTTTTTGGCGCTTCGGTCA-3', and the reverse primer is 5'-TTACGACACCAAACGATCGA-3'. *RP49*: forward primer is 5'-CGACGCTTCAAGGGACAGTATC-3', and the reverse primer is 5'-TCCGACCAGGTTACAAGAACTCTC-3'. RTPCR cycling parameters were as follows: 30 min at 50 °C, 15 min at 95 °C, and 30 cycles of 15 sec at 94 °C, 30 sec at 55 °C, and 30 sec at 72 °C.

## Supporting Information

**Figure S1.** Short, Weak Rhythms Persist in LNV Silenced and *pdf* Null Flies Regardless of *UAS<sup>Tik</sup>* Expression

Sample actograms and P-S rhythmicity values are presented for flies of the following genotypes: *pdfGal4/+; UASKIR/+ (pdfKIR)*, *pdfGal4/+; UAS<sup>Tik</sup><sup>1</sup>/UASKIR (pdfTikKIR)*, and *pdfGal4/UAS<sup>Tik</sup><sup>S1</sup>; pdf<sup>01</sup> (pdfTikpdf<sup>01</sup>)*.

## References

- Rutila JE, Suri V, Le M, So WV, Rosbash M, et al. (1998) CYCLE is a second bHLH-PAS clock protein essential for circadian rhythmicity and transcription of *Drosophila* period and timeless. *Cell* 93: 805–814.
- Allada R, White NE, So WV, Hall JC, Rosbash M (1998) A mutant *Drosophila* homolog of mammalian Clock disrupts circadian rhythms and transcription of period and timeless. *Cell* 93: 791–804.
- Allada R (2003) Circadian clocks: a tale of two feedback loops. *Cell* 112: 284–286.
- Darlington TK, Wager-Smith K, Ceriani MF, Staknis D, Gekakis N, et al. (1998) Closing the circadian loop: CLOCK-induced transcription of its own inhibitors *per* and *tim*. *Science* 280: 1599–1603.
- Hardin PE, Hall JC, Rosbash M (1990) Feedback of the *Drosophila* period gene product on circadian cycling of its messenger RNA levels. *Nature* 343: 536–540.
- Curtin KD, Huang ZJ, Rosbash M (1995) Temporally regulated nuclear entry of the *Drosophila* period protein contributes to the circadian clock. *Neuron* 14: 365–372.
- Edery I, Zwiebel LJ, Dembinska ME, Rosbash M (1994) Temporal phosphorylation of the *Drosophila* period protein. *Proc Natl Acad Sci U S A* 91: 2260–2264.
- Tomita J, Nakajima M, Kondo T, Iwasaki H (2005) No transcription-translation feedback in circadian rhythm of KaiC phosphorylation. *Science* 307: 251–254.
- Morrow M, Mazzotta G, Chen Z, Roenneberg T (2006) The right place at the right time: regulation of daily timing by phosphorylation. *Genes Dev* 20: 2629–2633.
- Toh KL, Jones CR, He Y, Eide EJ, Hinze WA, et al. (2001) An hPer2 phosphorylation site mutation in familial advanced sleep phase syndrome. *Science* 291: 1040–1043.
- Price JL, Blau J, Rothenfluh A, Abodeely M, Kloss B, et al. (1998) double-time is a novel *Drosophila* clock gene that regulates PERIOD protein accumulation. *Cell* 94: 83–95.
- Cyran SA, Yiannoulos G, Buchsbaum AM, Saez L, Young MW, et al. (2005) The double-time protein kinase regulates the subcellular localization of the *Drosophila* clock protein period. *J Neurosci* 25: 5430–5437.
- Martinek S, Inonog S, Manoukian AS, Young MW (2001) A role for the segment polarity gene *shaggy*/GSK-3 in the *Drosophila* circadian clock. *Cell* 105: 769–779.
- Sathyanarayanan S, Zheng X, Xiao R, Sehgal A (2004) Posttranslational

Found at doi:10.1371/journal.pgen.0040012.sg001 (635 KB EPS).

**Figure S2.** Evidence of Split Rhythms in pdfTik Flies

(A) Representative actograms (left) and Lomb-Scargle periodograms (right) for pdfTik flies exhibiting short and long periods. (B) Averaged actogram (left) and Lomb-Scargle periodogram (right) for all split pdfTik flies ( $n = 46$ ).

Found at doi:10.1371/journal.pgen.0040012.sg002 (1.3 MB EPS).

## Accession Numbers

Following are the accession numbers and FlyBase identifiers for the genes and protein products in this study. National Center for Biotechnology Information (NCBI) Entrez (<http://www.ncbi.nlm.nih.gov/>) Entrez/ Gene numbers: *CK2alpha*, GeneID 48448; *period*, GeneID 31251; *wille*, GeneID 33759. FlyBase (<http://flybase.org/>) identifiers: *CK2alpha*, FBgn0000258; *CK2alpha<sup>Timekeeper</sup>*, FBal0141857; *CK2alpha<sup>TimekeeperRevertant</sup>*, FBal0141856; *period*, FBgn0003068; *wille*, FBgn0016076. NCBI Entrez protein database numbers: *Drosophila* CK2alpha (isoform D), NP\_001036624; *Drosophila* PERIOD, NP\_525056.

## Acknowledgments

The authors wish to thank Michael Rosbash (Brandeis University), Grae Davis (University of California San Francisco), and the Bloomington *Drosophila* Stock Center at Indiana University for providing valuable reagents.

**Author contributions.** EMS, J-ML, R-AM, and RA conceived and designed the experiments. EMS, J-ML, and R-AM performed the experiments and analyzed the data. J-ML contributed reagents/materials/analysis tools. EMS and RA wrote the paper.

**Funding.** The authors acknowledge funding for this work provided by the National Institutes of Health (NIH) (MH067870 to RA and HD052341 to EMS).

**Competing interests.** The authors have declared that no competing interests exist.

- regulation of *Drosophila* PERIOD protein by protein phosphatase 2A. *Cell* 116: 603–615.
- Fang Y, Sathyanarayanan S, Sehgal A (2007) Post-translational regulation of the *Drosophila* circadian clock requires protein phosphatase 1 (PP1). *Genes Dev* 21: 1506–1518.
- Lin JM, Kilman VL, Keegan K, Paddock B, Emery-Le M, et al. (2002) A role for casein kinase 2alpha in the *Drosophila* circadian clock. *Nature* 420: 816–820.
- Lin JM, Schroeder A, Allada R (2005) In vivo circadian function of casein kinase 2 phosphorylation sites in *Drosophila* PERIOD. *J Neurosci* 25: 11175–11183.
- Litchfield DW (2003) Protein kinase CK2: structure, regulation, and role in cellular decisions of life and death. *Biochem J* 369: 1–15.
- Niefind K, Guerra B, Ermakova I, Issinger OG (2001) Crystal structure of human protein kinase CK2: insights into basic properties of the CK2 holoenzyme. *EMBO J* 20: 5320–5331.
- Akten B, Jauch E, Genova G, Kim E, Edery I, et al. (2003) A role for CK2 in the *Drosophila* circadian oscillator. *Nat Neurosci* 6: 251–257.
- Jauch E, Melzig J, Brkulj M, Raabe T (2002) In vivo functional analysis of *Drosophila* protein kinase casein kinase 2 (CK2) beta-subunit. *Gene* 298: 29–39.
- Nawathean P, Rosbash M (2004) The doubletime and CKII kinases collaborate to potentiate *Drosophila* PER transcriptional repressor activity. *Mol Cell* 13: 213–223.
- He Q, Cha J, He Q, Lee H-C, Yang Y, et al. (2006) CKI and CKII mediate the FREQUENCY-dependent phosphorylation of the WHITE COLLAR complex to close the *Neurospora* circadian negative feedback loop. *Genes Dev* 20: 2552–2565.
- Sugano S, Andronis C, Ong MS, Green RM, Tobin EM (1999) The protein kinase CK2 is involved in regulation of circadian rhythms in *Arabidopsis*. *Proc Natl Acad Sci U S A* 96: 12362–12366.
- Bose A, Kahali B, Zhang S, Lin JM, Allada R, et al. (2006) *Drosophila* CK2 regulates lateral-inhibition during eye and bristle development. *Mech Dev* 123: 649–664.
- Rasmussen T, Skjoth IH, Jensen HH, Niefind K, Boldyreff B, et al. (2005) Biochemical characterization of the recombinant human *Drosophila* homologues Timekeeper and Andante involved in the *Drosophila* circadian oscillator. *Mol Cell Biochem* 274: 151–161.
- Emery P, So WV, Kaneko M, Hall JC, Rosbash M (1998) CRY, a *Drosophila* clock and light-regulated cryptochrome, is a major contributor to circadian rhythm resetting and photosensitivity. *Cell* 95: 669–679.

28. Helfrich-Forster C (2003) The neuroarchitecture of the circadian clock in the brain of *Drosophila melanogaster*. *Microsc Res Tech* 62: 94–102.
29. Kaneko M, Hall JC (2000) Neuroanatomy of cells expressing clock genes in *Drosophila*: transgenic manipulation of the period and timeless genes to mark the perikarya of circadian pacemaker neurons and their projections. *J Comp Neurol* 422: 66–94.
30. Zhao J, Kilman VL, Keegan KP, Peng Y, Emery P, et al. (2003) *Drosophila* clock can generate ectopic circadian clocks. *Cell* 113: 755–766.
31. Moses K, Rubin GM (1991) Glass encodes a site-specific DNA-binding protein that is regulated in response to positional signals in the developing *Drosophila* eye. *Genes Dev* 5: 583–593.
32. Rothenfluh A, Abodeely M, Young MW (2000) Short-period mutations of *per* affect a double-time-dependent step in the *Drosophila* circadian clock. *Curr Biol* 10: 1399–1402.
33. Majercak J, Kalderon D, Edery I (1997) *Drosophila melanogaster* deficient in protein kinase A manifests behavior-specific arrhythmia but normal clock function. *Mol Cell Biol* 17: 5915–5922.
34. Renn SC, Park JH, Rosbash M, Hall JC, Taghert PH (1999) A pdf neuropeptide gene mutation and ablation of PDF neurons each cause severe abnormalities of behavioral circadian rhythms in *Drosophila*. *Cell* 99: 791–802.
35. Lin Y, Stormo GD, Taghert PH (2004) The neuropeptide pigment-dispersing factor coordinates pacemaker interactions in the *Drosophila* circadian system. *J Neurosci* 24: 7951–7957.
36. Nitabach MN, Blau J, Holmes TC (2002) Electrical silencing of *Drosophila* pacemaker neurons stops the free-running circadian clock. *Cell* 109: 485–495.
37. Van Dongen HP, Olofsen E, VanHartevelt JH, Kruyt EW (1999) A procedure of multiple period searching in unequally spaced time-series with the Lomb-Scargle method. *Biol Rhythm Res* 30: 149–177.
38. Nitabach MN, Wu Y, Sheeba V, Lemon WC, Strumbos J, et al. (2006) Electrical hyperexcitation of lateral ventral pacemaker neurons desynchronizes downstream circadian oscillators in the fly circadian circuit and induces multiple behavioral periods. *J Neurosci* 26: 26: 26.
39. McGuire S, Le P, Osborn A, Matsumoto K, Davis R (2003) Spatiotemporal rescue of memory dysfunction in *Drosophila*. *Science* 302: 1765–1768.
40. Pittendrigh C (1954) On temperature independence in the clock-system controlling emergence time in *Drosophila*. *Proc Natl Acad Sci U S A* 40: 1018–1029.
41. Zimmerman WF, Pittendrigh CS, Pavlidis T (1968) Temperature compensation of the circadian oscillation in *Drosophila pseudoobscura* and its entrainment by temperature cycles. *J Insect Physiol* 14: 669–684.
42. Hong HK, Chong JL, Song W, Song EJ, Jyawook AA, et al. (2007) Inducible and reversible Clock gene expression in brain using the tTA system for the study of circadian behavior. *PLoS Genetics* 3: 324–338. doi: 10.1371/journal.pgen.0030033
43. Ewer J, Rosbash M, Hall JC (1988) An inducible promoter fused to the period gene in *Drosophila* conditionally rescues adult *per*-mutant arrhythmicity. *Nature* 333: 82–84.
44. Shafer OT, Rosbash M, Truman JW (2002) Sequential nuclear accumulation of the clock proteins period and timeless in the pacemaker neurons of *Drosophila melanogaster*. *J Neurosci* 22: 5946–5954.
45. Zeng H, Hardin PE, Rosbash M (1994) Constitutive overexpression of the *Drosophila* period protein inhibits period mRNA cycling. *EMBO J* 13: 3590–3598.
46. Blau J, Young MW (1999) Cycling *vrille* expression is required for a functional *Drosophila* clock. *Cell* 99: 661–671.
47. Stoleru D, Peng Y, Agosto J, Rosbash M (2004) Coupled oscillators control morning and evening locomotor behaviour of *Drosophila*. *Nature* 431: 862–868.
48. Grima B, Chelot E, Xia R, Rouyer F (2004) Morning and evening peaks of activity rely on different clock neurons of the *Drosophila* brain. *Nature* 431: 869–873.
49. Kloss B, Price JL, Saez L, Blau J, Rothenfluh A, et al. (1998) The *Drosophila* clock gene double-time encodes a protein closely related to human casein kinase I $\epsilon$ . *Cell* 94: 97–107.
50. Bao S, Rihel J, Bjes E, Fan JY, Price JL (2001) The *Drosophila* double-timeS mutation delays the nuclear accumulation of period protein and affects the feedback regulation of period mRNA. *J Neurosci* 21: 7117–7126.
51. Rothenfluh A, Young MW, Saez L (2000) A TIMELESS-independent function for PERIOD proteins in the *Drosophila* clock. *Neuron* 26: 505–514.
52. Muskus MJ, Preuss F, Fan JY, Bjes E, Price JL (2007) *Drosophila* DBT lacking protein kinase activity produces long-period and arrhythmic circadian behavior and molecular rhythms. *Mol Cell Biol* 27: 8049–8064.
53. Pittendrigh CS, Daan S (1976) A functional analysis of circadian pacemaker in nocturnal rodents. V. Pacemaker structure: a clock for all seasons. *J Comp Physiol [A]* 106: 333–355.
54. Nagano M, Adachi A, Nakahama K, Nakamura T, Tamada M, et al. (2003) An abrupt shift in the day/night cycle causes desynchrony in the mammalian circadian center. *J Neurosci* 23: 6141–6151.
55. de la Iglesia HO, Cambras T, Schwartz WJ, Diez-Noguera A (2004) Forced desynchronization of dual circadian oscillators within the rat supra-chiasmatic nucleus. *Curr Biol* 14: 796–800.
56. Helfrich C (1986) Role of the optic lobes in the regulation of the locomotor activity rhythm of *Drosophila melanogaster*: behavioral analysis of neural mutants. *J Neurogenet* 3: 321–343.
57. Rieger D, Shafer OT, Tomioka K, Helfrich-Forster C (2006) Functional analysis of circadian pacemaker neurons in *Drosophila melanogaster*. *J Neurosci* 26: 2531–2543.
58. Yoshii T, Funada Y, Ibuki-Ishibashi T, Matsumoto A, Tanimura T, et al. (2004) *Drosophila cryb* mutation reveals two circadian clocks that drive locomotor rhythm and have different responsiveness to light. *J Insect Physiol* 50: 479–488.
59. Helfrich-Forster C, Tauber M, Park JH, Muhlig-Versen M, Schneuwly S, et al. (2000) Ectopic expression of the neuropeptide pigment-dispersing factor alters behavioral rhythms in *Drosophila melanogaster*. *J Neurosci* 20: 3339–3353.
60. Guerra B, Issinger OG (1999) Protein kinase CK2 and its role in cellular proliferation, development and pathology. *Electrophoresis* 20: 391–408.
61. Park JH, Helfrich-Forster C, Lee G, Liu L, Rosbash M, et al. (2000) Differential regulation of circadian pacemaker output by separate clock genes in *Drosophila*. *Proc Natl Acad Sci U S A* 97: 3608–3613.
62. Vosshall LB, Price JL, Sehgal A, Saez L, Young MW (1994) Block in nuclear localization of period protein by a second clock mutation, timeless. *Science* 263: 1606–1609.
63. Meyer P, Saez L, Young MW (2006) PER-TIM interactions in living *Drosophila* cells: an interval timer for the circadian clock. *Science* 311: 226–229.
64. Kim EY, Ko HW, Yu W, Hardin PE, Edery I (2007) A DOUBLETIME kinase binding domain on the *Drosophila* PERIOD protein is essential for its hyperphosphorylation, transcriptional repression, and circadian clock function. *Mol Cell Biol* 27: 5014–5028.
65. Nawathean P, Stoleru D, Rosbash M (2007) A small conserved domain of *Drosophila* PERIOD is important for circadian phosphorylation, nuclear localization, and transcriptional repressor activity. *Mol Cell Biol* 27: 5002–5013.
66. Hamblen M, Zehring WA, Kyriacou CP, Reddy P, Yu Q, et al. (1986) Germ-line transformation involving DNA from the period locus in *Drosophila melanogaster*: overlapping genomic fragments that restore circadian and ultradian rhythmicity to *per*<sup>0</sup> and *per*-mutants. *J Neurogenet* 3: 249–291.
67. Siwicki KK, Eastman C, Petersen G, Rosbash M, Hall JC (1988) Antibodies to the period gene product of *Drosophila* reveal diverse tissue distribution and rhythmic changes in the visual system. *Neuron* 1: 141–150.
68. Livak KJ, Schmittgen TD (2001) Analysis of relative gene expression data using real-time quantitative PCR and the 2(-Delta Delta C(T)) method. *Methods* 25: 402–408.
